# Supplementary material for: An aptasensor based on the microscopic enumeration of encoding gold nanoparticles for the detection of C-reactive protein
Source: Royal Society of Chemistry journal article supplement (doi:10.1039/c9ra06203c), 2019-01-01
Supplement: c9ra06203c1.pdf [file c9ra06203c1.pdf]

## **An aptasensor based on microscopic enumeration of encoding-gold nanoparticles for the detection of C-reactive protein**

Yuanfang Zhao,<sup>a,b</sup> Jingru Zhao,<sup>a</sup> Tian Jin,<sup>c</sup> Shuqing Sun,<sup>a,d,\*</sup> Wenlan Liu<sup>c</sup> and Ying Tan<sup>c,\*</sup>

<sup>a</sup> Institute of Optical Imaging and Sensing, Shenzhen Key Laboratory for Minimal Invasive Medical Technologies, The Graduate School at Shenzhen, Tsinghua University, Shenzhen, 518055, P. R. China.

<sup>b</sup> Department of Open FIESTA, Tsinghua University, Beijing, 100084, P. R. China.

<sup>c</sup> State Key Laboratory of Chemical Oncogenomics, Key Laboratory of Chemical Biology, The Graduate School at Shenzhen, Tsinghua University, Shenzhen, 518055, P. R. China.

<sup>d</sup> Department of Physics, Tsinghua University, Beijing 100084, P. R. China.

<sup>e</sup> The Central Laboratory, The First Affiliated Hospital of Shenzhen University, Shenzhen Second People's Hospital, Shenzhen 518035, China.

\* Corresponding author (Shuqing Sun)

Tel: +86- 0755-26036026 Fax: +86-0755-26032094

Email: sun.shuqing@sz.tsinghua.edu.cn sun.shuqing@sz.tsinghua.edu.cn(S. Sun);  
tan.ying@sz.tsinghua.edu.cn (Y. Tan)

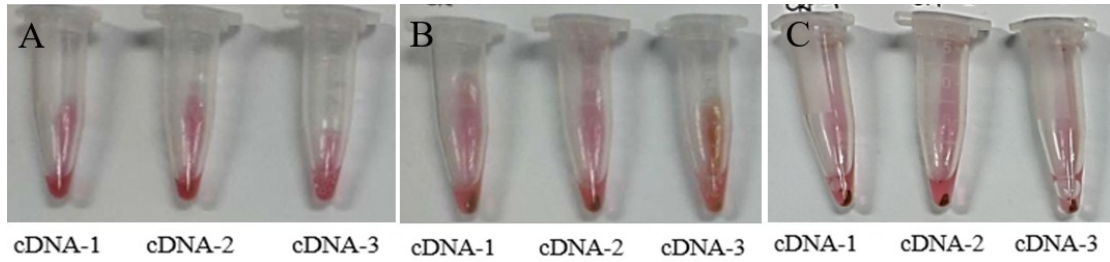

**Fig. S1.** (A) Photograph of the colorimetric images of AuNPs modified with different c-DNA, (B) Photograph of the colorimetric images right after the addition of MBs, (C) Photograph the colorimetric images after incubation of MBs and AuNPs for some time

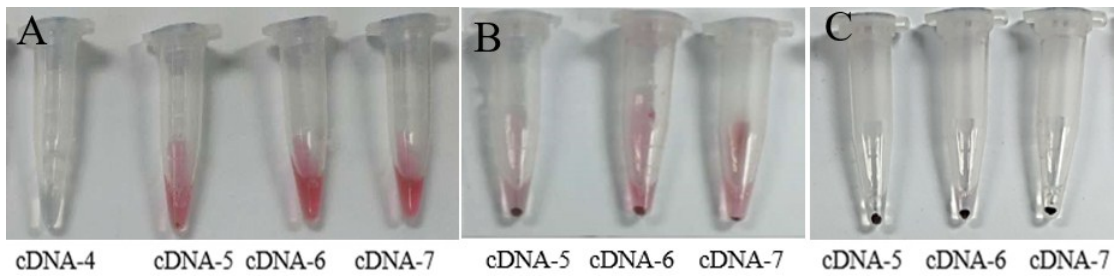

**Fig. S2.** (A) Photograph of the colorimetric images of AuNPs modified with different c-DNA, (B) Photograph of the colorimetric images right after the addition of MBs, (C) Photograph the colorimetric images after incubation of MBs and AuNPs for some time

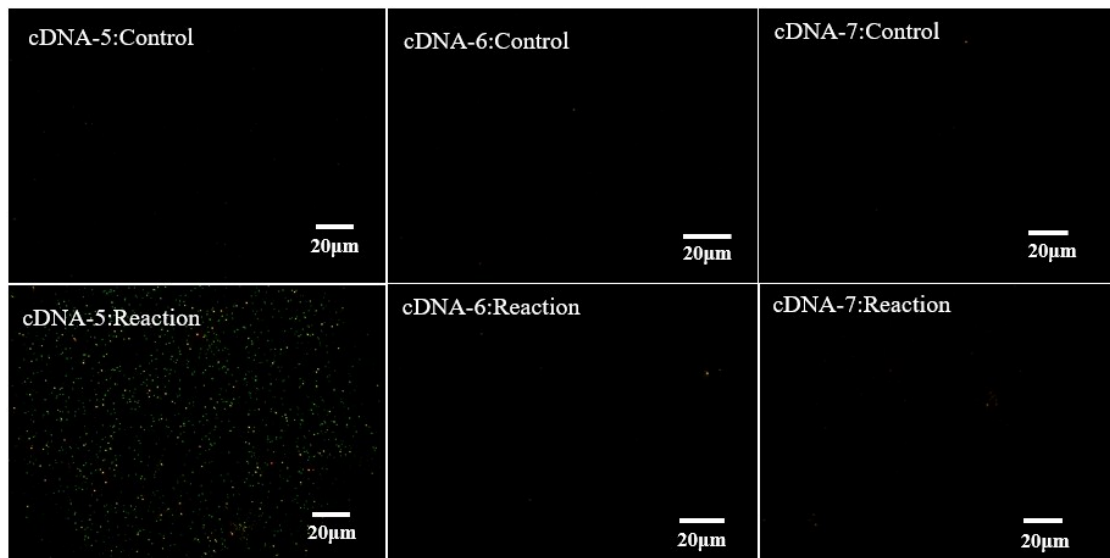

**Fig. S3.** Representative DFM images of AuNPs displaced by CRP and its control group

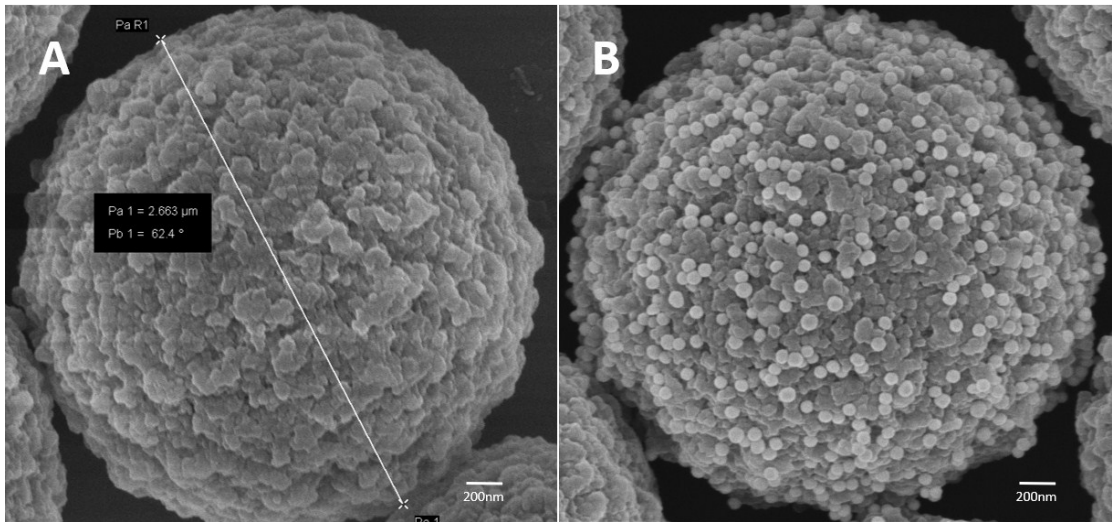

**Fig. S4.** SEM image of the MBs before (A) and after (B) modification with AuNPs

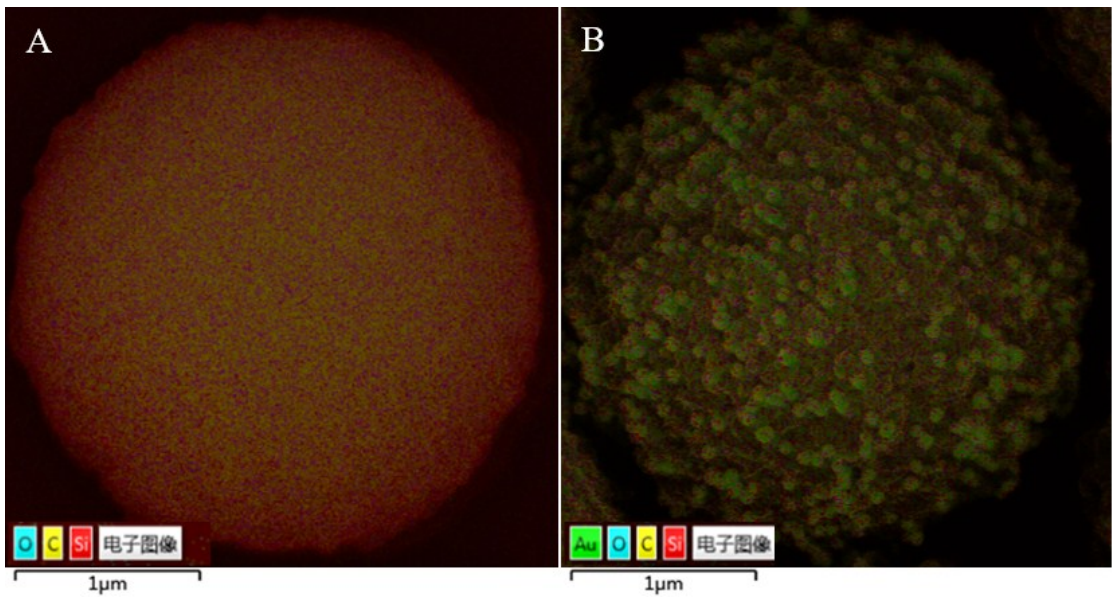

**Fig.S5.** The EDS image of the MBs before (A) and after (B) modification with AuNPs, green represents for Au element, light green represents for Pt elements

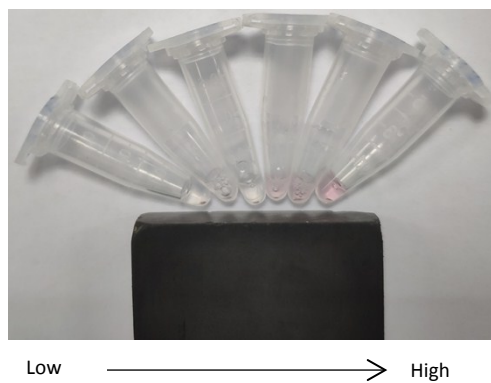

**Fig. S6.** Photograph of colorimetric image of supernatants after the addition of CRP of gradient concentration (from low to high concentration: 0, 0.43, 0.86, 1.30, 1.74, 2.17  $\mu\text{M}$ , respectively.)

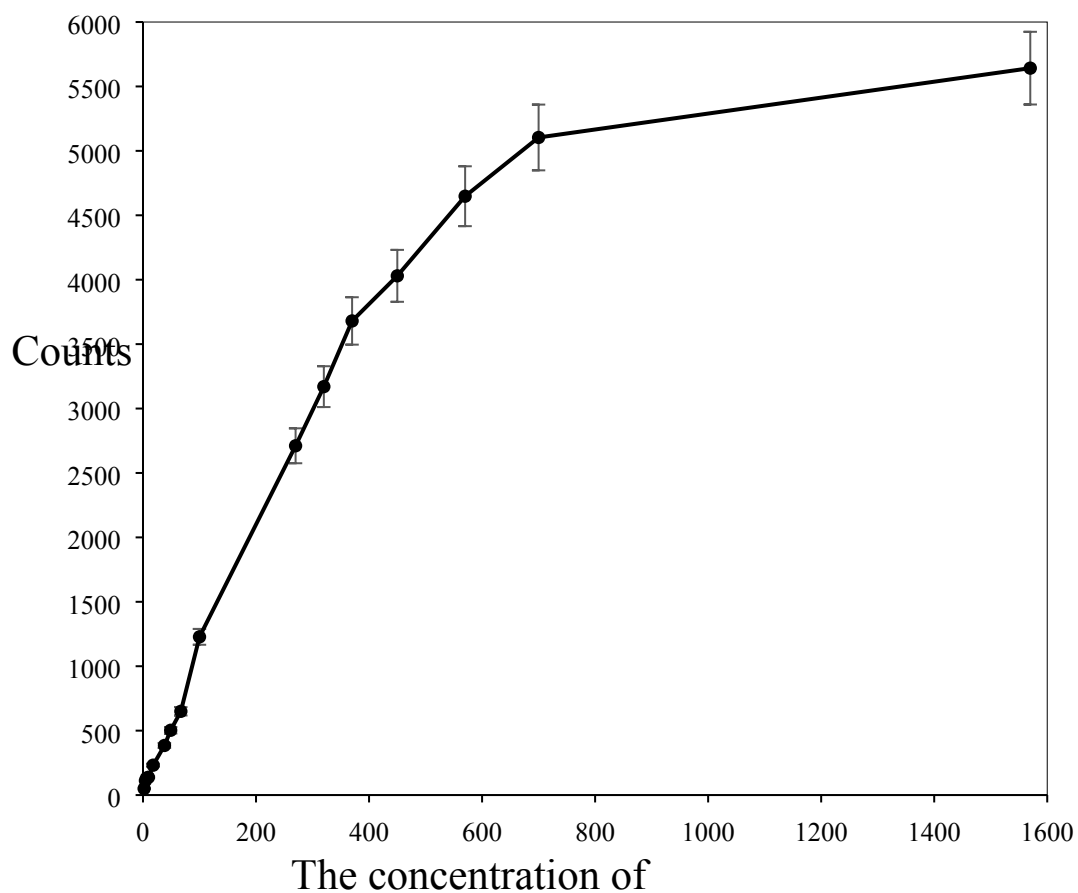

**Fig. S7.** The relationship between AuNPs counts and CRP concentrations.

The error bar was the standard deviation value of three repetitions.

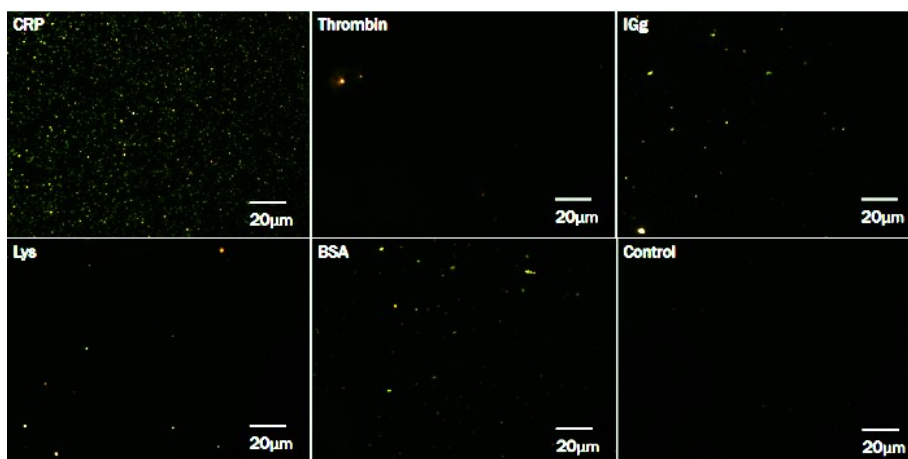

**Fig. S8.** Typical DFM images of AuNPs displaced by addition of different proteins. CRP (0.43  $\mu\text{M}$ ), Thrombin (5  $\mu\text{M}$ ), IgG (5  $\mu\text{M}$ ), Lys (5  $\mu\text{M}$ ), BSA (5  $\mu\text{M}$ ), and buffer only.

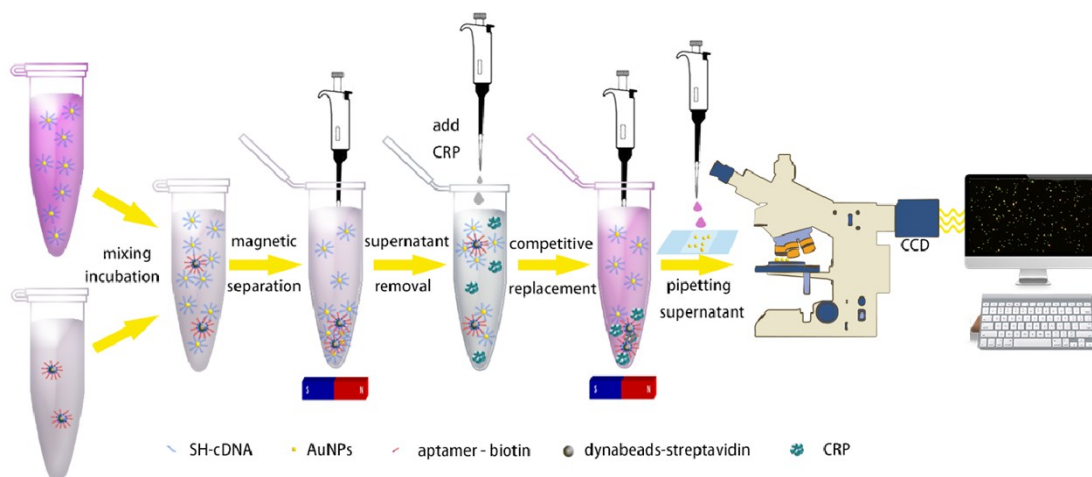

**Fig. S9.** Schematic illustration for the detection of the target CRP.

As is shown in Fig. S9, mixed functionalized AuNPs with c-DNA and functionalized MBs with aptamer to fabricate an aptamer-based probe with sandwich structure by DNA hybridization. Then the AuNPs not attached to the MBs in the supernatant are removed, and finally a stable nanoprobe for detecting CRP is prepared. In the presence of CRP, the interaction between CRP and aptamer is stronger than the interaction of complementary pairing between cDNA and aptamer, the AuNPs attached to the nanoprobe will be replaced by the CRP from the MBs and free in the supernatant. The green scattering information of the AuNPs was recorded by CCD on the DFM, and then counted the number of free AuNPs by the MATLAB program, and finally the relationship between AuNPs counts and the CRP concentration were obtained. Thereby achieving the purpose of detecting C-reactive protein.
